# Supplementary material
Source: publisher site journal article supplement (https://www.dovepress.com/article/186722)
Supplement: Supplementary file 1 [file get_supplementary_file.php]

## Supplementary materials

## Table S1. The outpatient satisfaction indicator system

| Primary Index | Secondary Index | Research Items |
| --- | --- | --- |
| Pre-diagnosis | Accuracy of medical guidance | 1. Were you satisfied with the accuracy of the registration guidance service provided by the staff? |
| Service attitude of the guidance staff | 2. Were you satisfied with the service attitude of the guidance staff? |
| Waiting time for registration/payment | 3. Were you satisfied with the waiting time at the window when you registered or paid the fee? |
| Service attitude of window business staff | 4. Were you satisfied with the attitude of window business staff for registration and payment? |
| Waiting order and medical treatment environment | 5. Were you satisfied with the ambience of the waiting area and the environment for treatment? |
| Queuing time for consultation | 6. Were you satisfied with the waiting time for the doctor's consultation? |
| Treatment | Patient privacy protection | 7. Were you satisfied with the medical staff's protection of your privacy (were there any other patients in the consulting room waiting for a consultation)? |
| Length of diagnosis and treatment service | 8. What did you think about the amount of time required for your diagnosis and treatment by the doctor? |
| Service attitude of outpatient doctor | 9. Were you satisfied with the service attitude of the doctor? |
| Carefulness of examination and diagnosis | 10. Were you satisfied with the carefulness of the doctor's diagnosis of your illness? |
| Notification of illness and treatment plan | 11. Were you satisfied with the doctor's notification and explanation of the examination results, the treatment plan, and the drugs prescribed? |
| Cost notification | 12. Were you satisfied with the doctor's notification of the treatment cost and the selection of treatment? |
| Auxiliary examination | Service attitude of radiological examination | 13. Were you satisfied with the service attitude of the radiologist? |
| Report time of radiological examination | 14. Were you satisfied with the report time of the radiological examination (CT, MRI)? |
| Service attitude of ultrasound examination | 15. Were you satisfied with the service attitude of the ultrasound examinant? |
| Report time of the ultrasound examination | 16. Were you satisfied with the report time of the ultrasound examination? |
| Service attitude of electrocardiographic examination | 17. Were you satisfied with the service attitude of the electrocardiographic examinant? |
| Report time of electrocardiographic examination | 18. Were you satisfied with the report time of the electrocardiographic examination? |
| Service attitude of clinical laboratory examination | 19. Were you satisfied with the service attitude of the clinical laboratory examinant? |
| Report time of clinical laboratory examination | 20. Were you satisfied with the report time of the clinical laboratory examination? |
| Drug withdrawal | Waiting time for drug withdrawal | 21. Were you satisfied with the waiting time for drug withdrawal? |
| Notification of drug administration | 22. Were you satisfied with the introduction of drug administration by the pharmacy staff? |
| Service attitude of pharmacy staff | 23. Were you satisfied with the service attitude of the pharmacy staff? |
| Environment and logistics service | Outpatient environmental sanitation | 24. Were you satisfied with the environmental sanitation of the general public area in the outpatient department of the hospital? |
| Toilet cleanliness | 25. Were you satisfied with the cleanliness of the outpatient toilets? |
| Hospital guidance system | 26. Were you satisfied with all types of guide signs in the hospital? |
| Publication of doctor's consultation information | 27. Were you satisfied with the clarity of the information on doctor's outpatient services published by the hospital? |
| Publication of doctor's personal information | 28. Were you satisfied with the clarity of the doctor's personal information published by the hospital? |
| Complaint information publication | 29. Were you satisfied with the complaint department, reception time and contact number published by the hospital? |
| Effect of complaints handling | 30. Were you satisfied with the procedures for handling complaints in the hospital? |
| Cost performance of diagnosis and treatment | 31. In view of your condition and the provided treatment, do you think the medical expenses were acceptable? |

## Table S2. The inpatient satisfaction indicator system

| Primary Index | Secondary Index | Research item |
| --- | --- | --- |
| Hospitalization service | Smooth degree of admission | 1. Did you think the procedure for admission was satisfactory? |
| Admission education | 2. On admission, were you satisfied with the nurses' introduction of the doctor in charge, the nurse in charge, the hospital environment and matters needing attention in the hospital? |
| The timeliness of the first diagnosis | 3. On the day of admission, were you satisfied with the time you waited for a doctor’s examination and diagnosis in the ward? |
| Carefulness of the first diagnosis | 4. On the day of admission, were you satisfied with the carefulness of the doctor's first diagnosis? |
| Carefulness of the doctor's ward round | 5. When the chief doctor did the ward rounds, did you think he/she was concerned about your disease condition? |
| Frequency of the chief doctor's ward round | 6. Which of the following was the frequency of ward rounds by your chief doctor? |
| Frequency of the resident doctor's ward round | 7. Which of the following was the frequency of ward rounds by your resident doctor? |
| Treatment | Timeliness of emergency settlement | 8. Did the staff on duty arrive in time when your condition worsened? |
| Notification of patient's condition | 9. Were you satisfied with your doctor's diagnosis and assessment of your condition? |
| Notification of treatment plan | 10. Were you satisfied with the doctor's notification of your treatment plan, prognosis and medical risks involved? |
| Written informed consent | 11. Were you satisfied with the written informed consent procedure performed by doctors before surgery, anesthesia, high-risk diagnosis and treatments (angiography, intervention, etc.) or blood transfusion (using blood products)? |
| Patient privacy protection | 12. Were you satisfied with the medical staff's protection of your privacy in your diagnosis and treatment regime? |
| Pain and comfort management | 13. Were you satisfied with the care and treatment of your pain and discomfort by the healthcare team? |
| Technical capacity of doctors | 14. What did you think of the doctors’ overall ability for diagnosis and treatment of your illness? |
| Improvement of symptoms of disease | 15. How well do you think the symptoms of your disease were improved by treatment? |
| Notification of medication knowledge | 16. Did medical staff clearly tell you about the use of medication, adverse reactions and precautions? |
| Timeliness of call processing | 17. When you had an urgent need, did the nurse arrive in time after the call? |
| Introduction of nursing operation | 18. Were you satisfied with the nurses' introduction of the nursing operation and matters needing attention? |
| Effect of health education | 19. Were you satisfied with the diet, and mental and health guidance given by the nurses? |
| Technical capacity of nurses | 20. What did you think of the nurses' overall technical capacity? |
| Auxiliary examination | Informing timeliness of radiological examination results | 21. Were you satisfied with the report time of the radiological examination (CT, MRI)? |
| Informing timeliness of ultrasonic examination results | 22. Were you satisfied with the report time of the ultrasonic examination? |
| Informing timeliness of electrocardiogram examination results | 23. Were you satisfied with the report time of the electrocardiographic examination? |
| Waiting time of the appointment of radiological examination | 24. Were you satisfied with the waiting time for the appointment for radiological examination (CT, MRI)? |
| Waiting time of the appointment of ultrasonic examination | 25. Were you satisfied with the waiting time for the appointment for your ultrasound examination? |
| Waiting time of the appointment of electrocardiographic examination | 26. Were you satisfied with the waiting time for your appointment for an electrocardiographic examination? |
| Service attitude | Doctor service attitude | 27. Were you satisfied with the service attitude of the inpatient doctor? |
| Nurse service attitude | 28. Were you satisfied with the service attitude of the inpatient nurse? |
| Overall service flow | 29. Were you satisfied with the overall service flow of the hospital? |
| Environment and logistics services | Expense query method | 30. Were you satisfied with the publicity of the expenses (the "one day list" or the detailed inquiry service for the daily expenses) during your hospitalization? |
| Cost-effectiveness perception of diagnosis and treatment | 31. In view of your condition and treatment effects, do you think the medical expenses are acceptable? |
| Hospital guidance system | 32. Were you satisfied with the clarity of the identification settings and instructions in the hospital? |
| Cleanliness of ward toilet | 33. Were you satisfied with the cleanliness of the ward toilet? |
| Bedding cleanliness | 34. Were you satisfied with the cleanliness of the bedding? |
| Dietary service | 35. Were you satisfied with the dietary service of the hospital? |
| Hospital security measures | 36. Were you satisfied with the security personnel and facilities in the hospital? |
| Patient identification | 37. Were you satisfied with the medical staff checking your identity in at least two ways (name, age, and hospital number, etc.) in the diagnosis and treatment? |
| Medical ethics | 38. Were you satisfied with the law-abiding, integrity, self-discipline and due diligence of the medical staff? |
| Surgical anesthesia | Timeliness of surgical schedule | 39. Was the doctor able to arrange the operation for you in time? |
| Notification of surgical program | 40. Before operation (including interventional therapy), did your chief physician tell you the operation purpose, operation program, risks, and other alternatives in a manner that you could understand? |
| Notification of the estimated surgical cost | 41. Before operation (including interventional therapy), did your chief doctor tell you the estimated cost, the use and selection of high-value consumables in a way that you could understand? |
| Notification of anesthesia type | 42. Before operation (including interventional therapy), did the anesthesiologist tell you or your family members about the anesthesia type and other options available to you in a way that you could understand? |
| Notification of risk of postoperative pain relieve | 43. Before operation (including interventional therapy), did your anesthesiologist tell you or your family members about the risk of postoperative pain relief in a manner that you could understand? |

## Table S3. Hospital locations of outpatients and inpatients

| Province | Outpatients | | Inpatients | |
| --- | --- | --- | --- | --- |
| Number of hospitals | Number of patients | Number of hospitals | Number of patients |
| Anhui Province | 2 | 684 | 3 | 1,286 |
| Beijing | 9 | 4,418 | 17 | 6,126 |
| Gansu Province |  |  | 11 | 4,445 |
| Guangdong Province | 93 | 21,394 | 96 | 12,822 |
| The Guangxi Zhuang Autonomous Region | 9 | 3,433 | 2 | 303 |
| Guizhou Province | 2 | 526 | 10 | 3,856 |
| Hainan Province | 1 | 230 | 3 | 1,184 |
| Hebei Province | 2 | 1,003 | 4 | 1,786 |
| Henan Province | 1 | 2,073 | 4 | 4,728 |
| Hubei Province | 15 | 9,951 | 21 | 14,826 |
| Hunan Province | 1 | 52 | 1 | 197 |
| Jilin Province | 1 | 218 | 15 | 8,748 |
| Jiangsu Province | 1 | 2,309 | 1 | 5,342 |
| Jiangxi Province | 1 | 5,445 | 1 | 6,745 |
| Liaoning Province | 1 | 952 | 7 | 2,791 |
| The Inner Mongolia Autonomous Region |  |  | 7 | 3,292 |
| The Ningxia Hui Autonomous Region |  |  | 12 | 3,945 |
| Qinghai Province | 2 | 225 | 13 | 4,186 |
| Shandong Province | 2 | 1,316 | 6 | 1,971 |
| Shaanxi Province | 3 | 5,891 | 3 | 8,044 |
| Shanghai | 1 | 2,667 | 2 | 1,804 |
| Sichuan Province | 31 | 17,442 | 67 | 52,270 |
| Tianjin | 1 | 2,441 | 1 | 1,266 |
| Tibet Autonomous Region |  |  | 26 | 12,041 |
| The Xinjiang Uygur Autonomous Region |  |  | 7 | 3,087 |
| Yunnan Province |  |  | 9 | 4,810 |
| Zhejiang Province | 3 | 2,263 | 9 | 5,895 |
| Chongqing | 15 | 13,263 | 55 | 51,419 |
| Total | 197 | 98,196 | 413 | 229,215 |
